# Supplementary material for: IL-1 Contributes to the Anti-Cancer Efficacy of Ingenol Mebutate
Source: PubMed Central journal article supplement (PMC4839727; doi:10.1371/journal.pone.0153975), 2016-04-21

## S1 File

**Figure A.** B16 relapse rates in Rag1<sup>-/-</sup> mice after ingenol mebutate treatment. Rag-1<sup>-/-</sup> mice (B6.129S7-Rag1<sup>tm1Mom/J</sup>; Jackson Laboratory, Bar Harbor, ME, USA) bred in-house at QIMR B and C57BL/6 mice (ARC, Perth, Australia) were injected s.c. with B16 cells ( $5 \times 10^5$  cells per mouse in 50  $\mu$ l medium) on day -3. Relapse rates were not significantly different for ingenol mebutate treated Rag1<sup>-/-</sup> and C57BL/6 mice, log rank statistic,  $p=0.37$ .

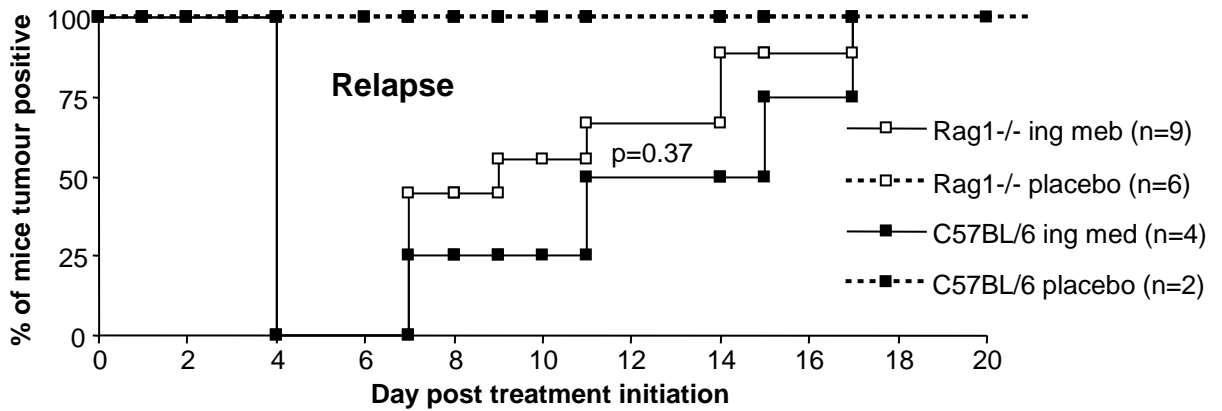

**Figure B.** To explore a role for ADCC in the B16 model [Challacombe, et al., 2006], relapse rates were examined in Fc receptor common gamma chain deficient mice ( $Fc\gamma R^{-/-}$ ) mice (B6.129P2- $Fc\epsilon r1g^{tm1Rav}$  N12, purchased from Taconic Germantown, NY, USA). Relapse rates were slightly higher (but not significantly) (a, Relapse), and survival was slightly (and significantly) lower (b, Survival) in  $Fc\gamma R^{-/-}$  mice. However, placebo treated B16 tumour grew slightly faster in  $Fc\gamma R^{-/-}$  mice (c, Growth). As the slightly higher relapse rates could thus simply be due to more robust growth of B16 tumours in  $Fc\gamma R^{-/-}$  mice, these experiments provided no conclusive insights into the role of ADCC in this model.

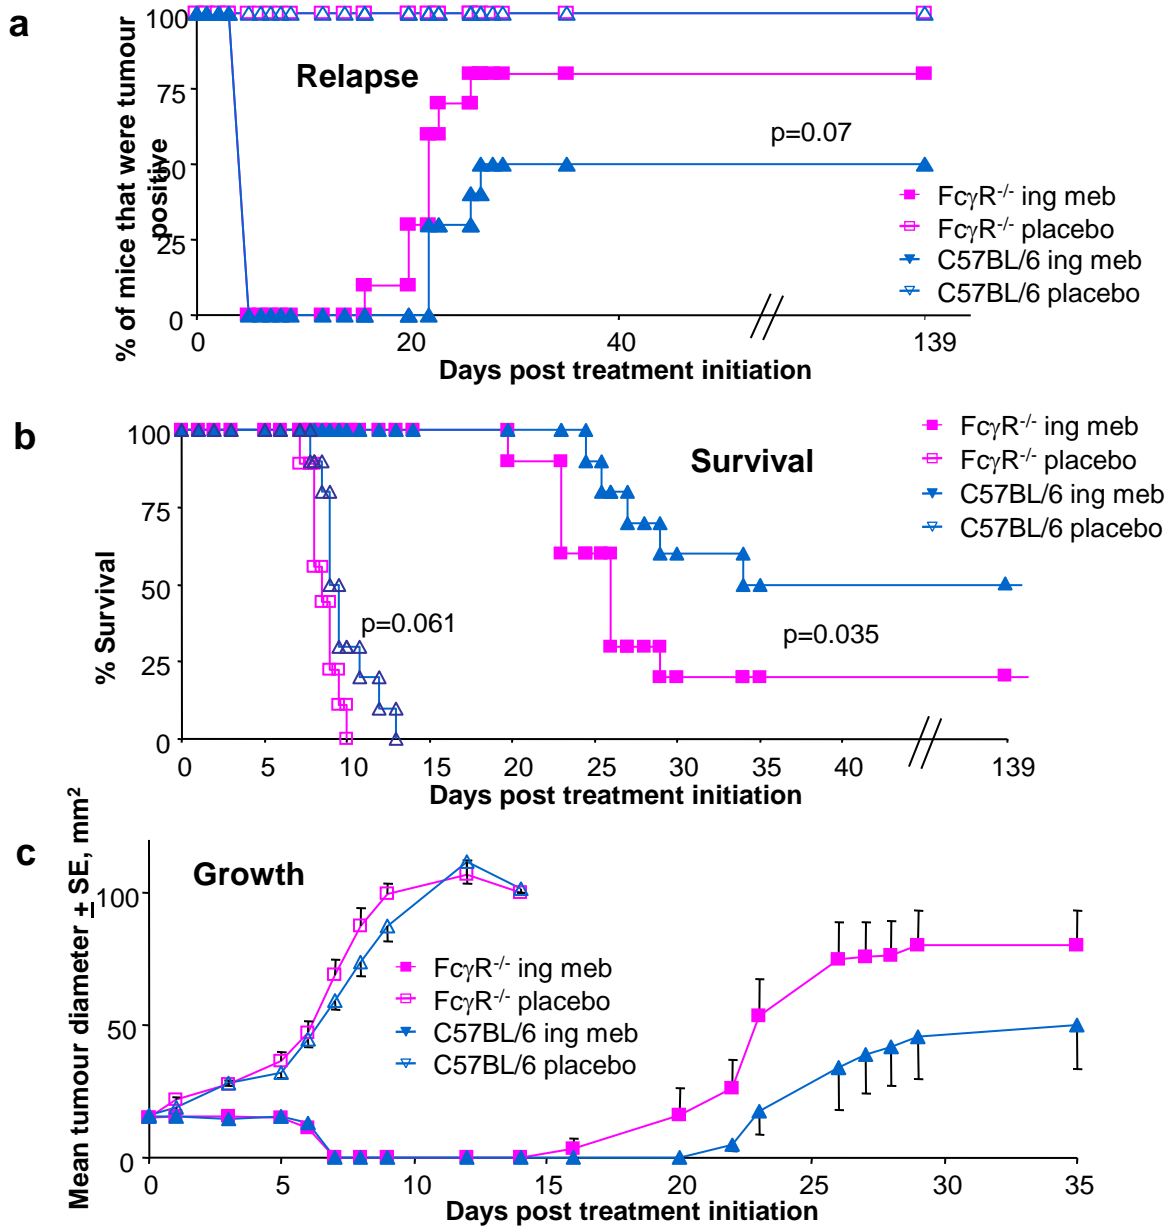

**Figure B legend.** B16 relapse, survival and growth in  $Fc\gamma R^{-/-}$  mice after ingenol mebutate treatment. (a) Relapse rates of B16 tumours in  $Fc\gamma R^{-/-}$  mice after ingenol mebutate ( $Fc\gamma R^{-/-}$  ing meb) or placebo treatment ( $Fc\gamma R^{-/-}$  placebo) and C57BL/6 mice after ingenol mebutate (C57BL/6 ing meb) or placebo treatment (C57BL/6 placebo) (n=9/10 mice per group). (b) Survival rates for the same mice described in a. A death event was recorded when the tumour reached 100 mm<sup>2</sup>. Statistics by log rank. (c) Tumour growth curves for the same mice described in a. When a tumour reached  $\approx$ 100 mm<sup>2</sup> the mouse was euthanized and for subsequent time points the value of 100 mm<sup>2</sup> was retained for that mouse in the calculation of the mean tumour diameters; thus n is the same for each time point.

**Figure C.** The role of anti-cancer antibodies was further investigated in B cell deficient  $\mu$ MT mice. No relapse events were seen after ingenol mebutate treatment of B16 tumours grown in  $\mu$ MT mice, whereas a 36% relapse rate was seen in C57BL/6 mice (a, Relapse). The reason for the lack of relapse in  $\mu$ MT mice was likely due to the very much slower growth rate of B16 tumours in  $\mu$ MT mice, when compared with C57BL/6 mice (b, Growth). The absence of antigen non-specific suppressor B cells may be responsible [Shah, et al.. *Int J Cancer*. 2005;117: 574-586] for this reduced rate of tumour growth  $\mu$ MT mice. The different growth rates in the absence of ingenol mebutate treatment, means  $\mu$ MT mice (like  $Fc\gamma R^{-/-}$  mice) are of limited value for evaluating the role of antibodies in the anti-cancer efficacy of ingenol mebutate.

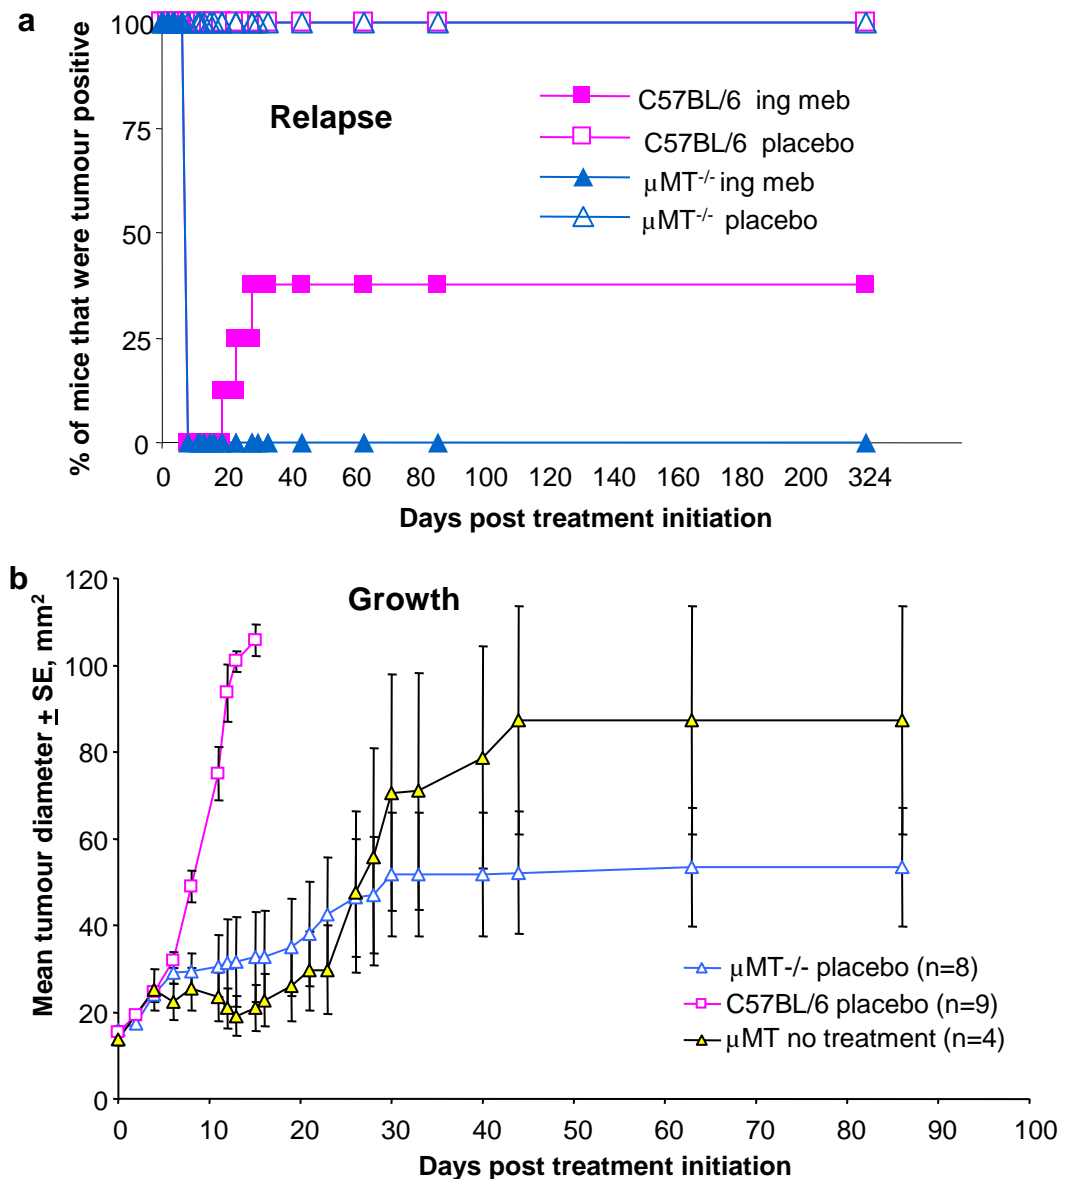

**Figure C legend.** B16 relapse rates in  $\mu$ MT<sup>-/-</sup> mice after ingenol mebutate treatment. (a) Relapse rates after ingenol mebutate and placebo treatment of B16 tumours in C57BL/6 mice and  $\mu$ MT<sup>-/-</sup> mice (n=8/9 mice per group). (b) Growth curves of B16 tumours in C57BL/6 and  $\mu$ MT<sup>-/-</sup> mice in the absence of ingenol mebutate treatment.

**Figure D.** Growth of B16 tumours in placebo treated MyD88<sup>-/-</sup> (n=7) and C57BL/6 mice (n=7). The first mice were euthanized on day 7. Tumour means for time points subsequent to day 7 were calculated using only those mice that remained alive.

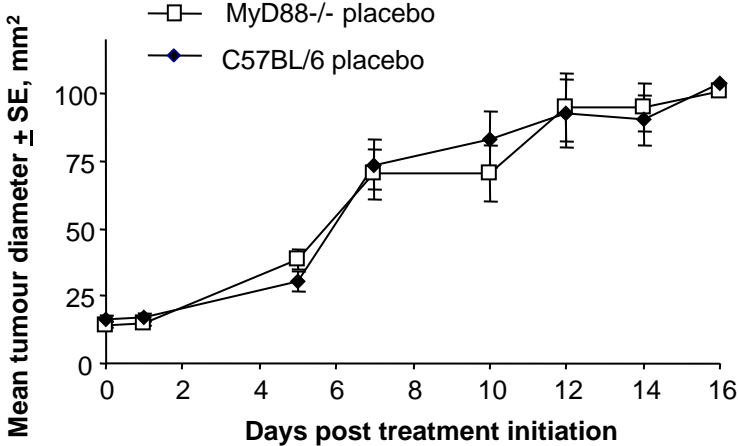

**Figure E.** Anakinra did not affect B16 growth. Growth data from mice shown in Fig. 2, illustrating that anakinra treatment does not affect growth of B16 tumours in C57BL/6 mice.

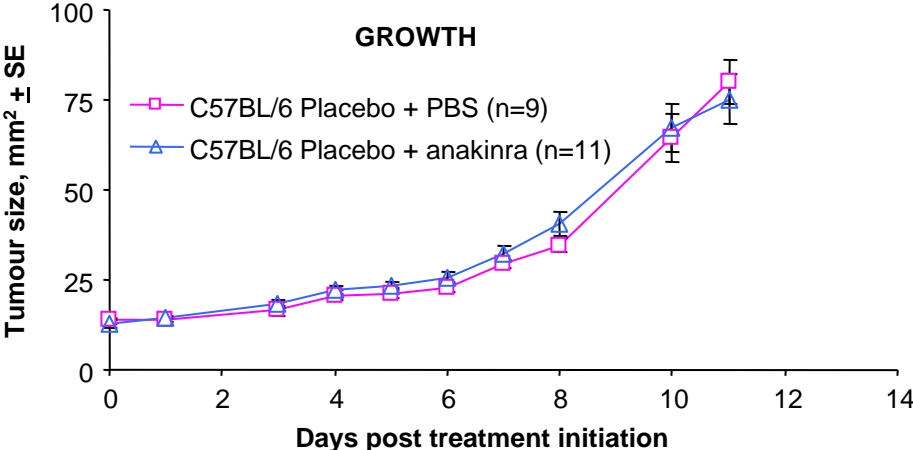

**Figure F.** High resolution images of ApoTag staining (with haematoxylin counterstain) of a neutrophil rich areas in the dermis of ingenol mebutate treatment sites 2 days post initiation of ingenol mebutate treatment. Green arrows show polymorphonuclear cells (predominantly neutrophils) and red arrows show cells staining with ApoTag.

**Ingenol mebutate + PBS**

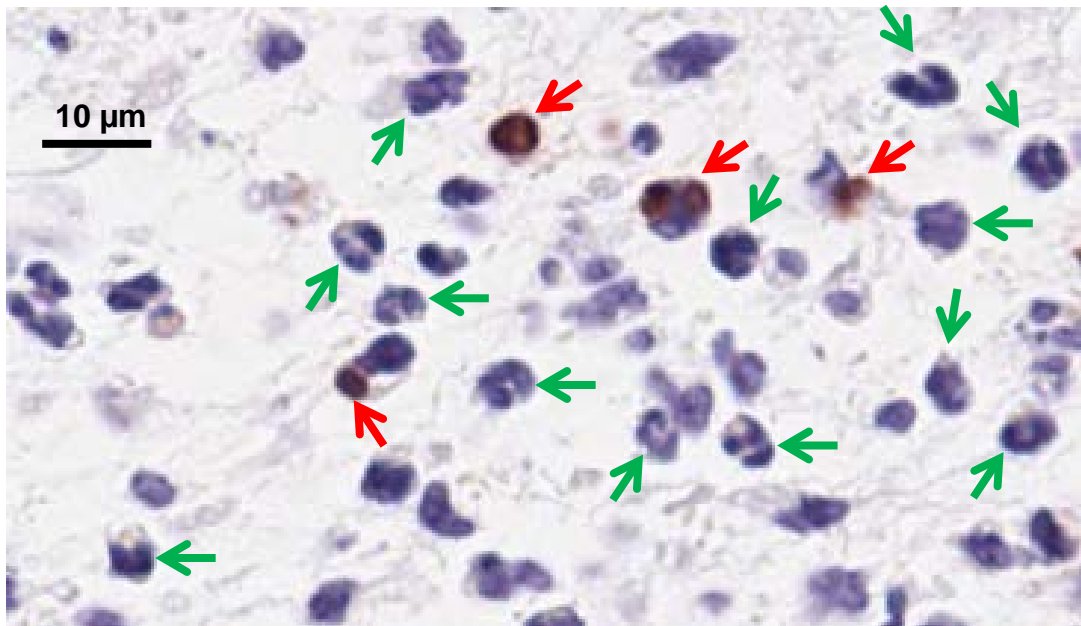

**Ingenol mebutate + anakinra**

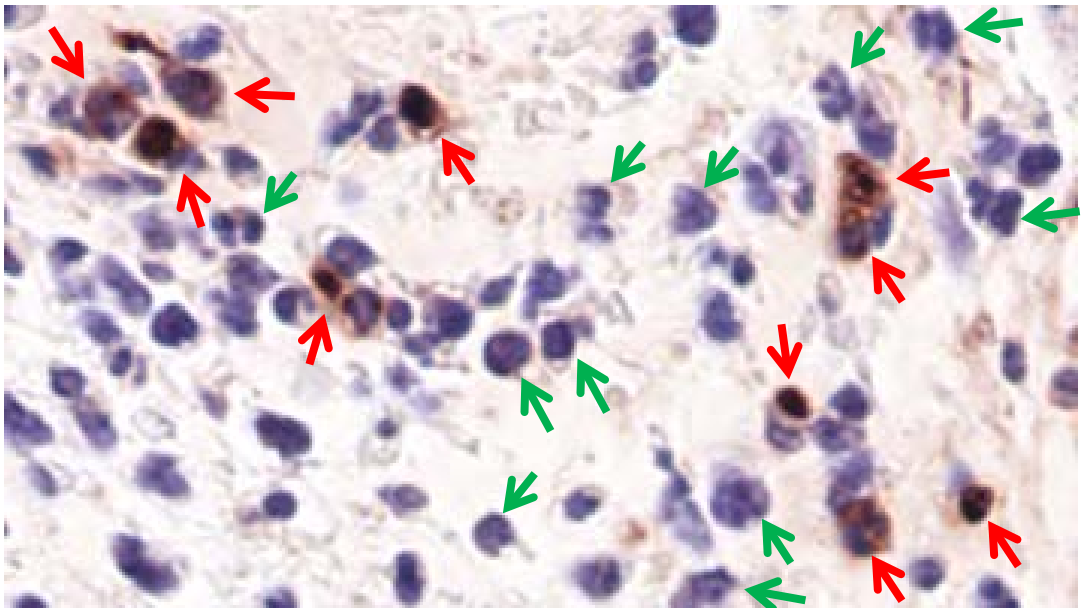

**Figure G.** IL-1 $\alpha$  levels in skin and B16 tumours. Skin; naïve mouse skin (no B16 tumours) was excised from C57BL/6 and MyD88<sup>-/-</sup> mice and analysed for IL-1 $\alpha$  levels (n=3 mice per group). B16 tumour; B16 tumours were excised from MyD88<sup>-/-</sup> and wild-type mice day 7 post inoculation, with extraneous tissue (eg skin) removed as much as possible and analysed for IL-1 $\alpha$  levels (n=3 mice per group).

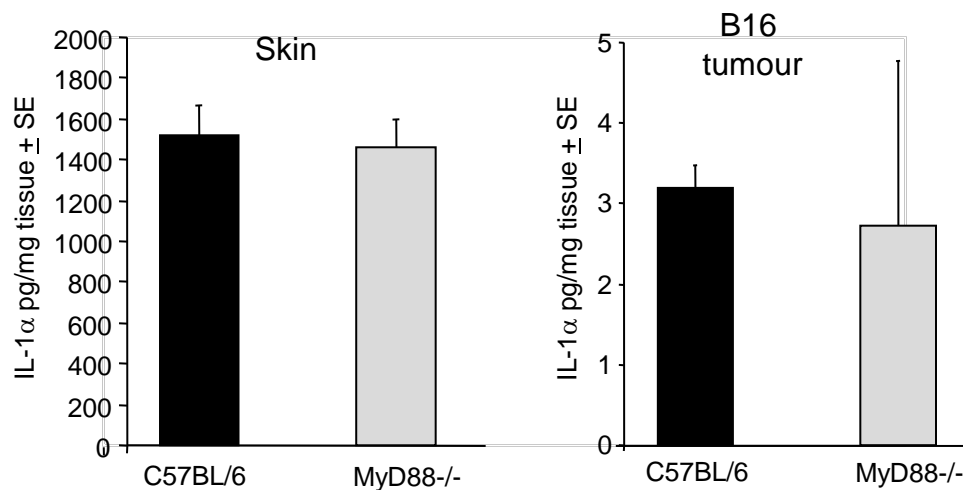

).

**Figure H.** Caspase 1 in skin after ingenol mebutate treatment. Mice (n=2 per time point) were treated once with ingenol mebutate on a shaved skin area ( $\approx 0.5 - 1 \text{ mm}^2$ ) on the back. At the indicated times the mice were euthanized and a scalpel blade was used to gently scrap the surface of the skin, with material placed into 450  $\mu\text{l}$  10 mM Tris pH7, with 0.1% Igepal and protease inhibitor cocktail at 4°C. The preparation was sonicated (1 min x 5) and debris removed by centrifugation at 50,000 g for 40 mins at 4°C. The supernatant was analysed by immunoblotting using anti-Caspase-1 p20 (Casper-1 clone, Adipogen), anti-Caspase-1 p10 (A-19 clone, Santa Cruz) and an anti-GAPDH (polyclonal mouse, BioScientific) loading control.

Ingenol mebutate treatment resulted in substantial increase in pro-caspase-1 protein levels, and the clear presence of the active caspase p20 and p10 species, illustrating caspase-1 activation [Guey et al.. Proc Natl Acad Sci U S A. 2014;111: 17254-17259].

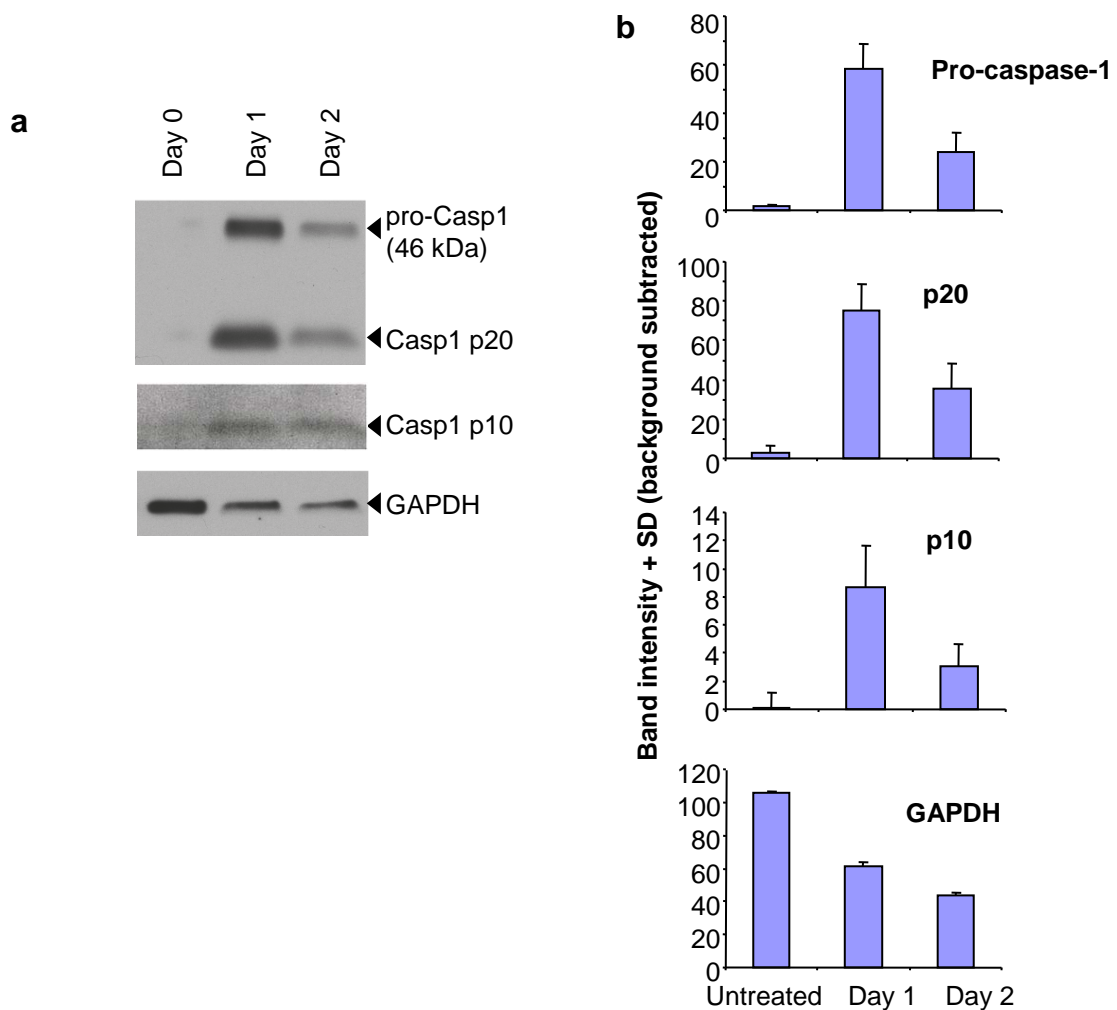

**Figure J legend.** (a) Western blot of skin samples at the indicated times after ingenol mebutate treatment (b). Densitometry of bands shown a. Mean of 2 exposures.



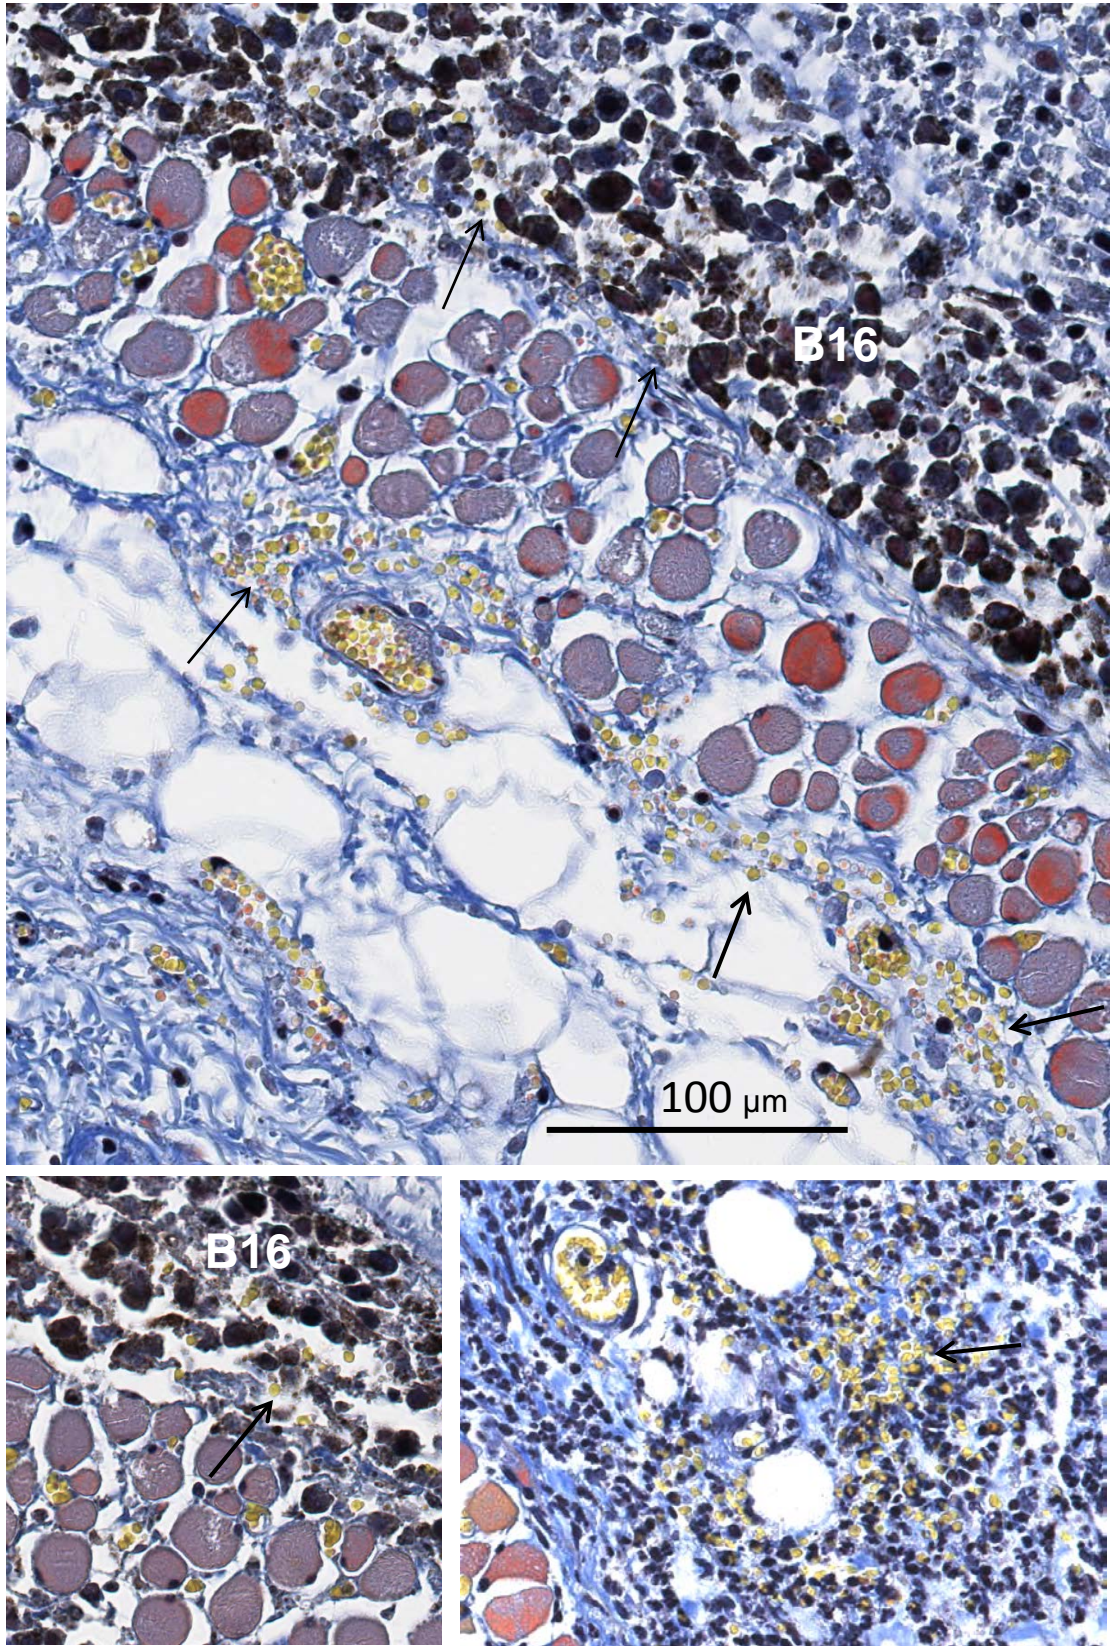

**Figure I.** Haemorrhage post ingeol mebutate treatment. Martius Scarlet Blue (MSB) staining of treatment sites 2 days post initiation of ingeol mebutate treatment. MSB is designed to stain fibrin (red), but also stains red blood cell yellow (arrows), thereby providing a clear demonstration of haemorrhage. The black B16 cells (melanin/melanosomes) are also clearly visible (B16). Neutrophils infiltrates are also evident (dark blue polymorphonuclear morphology, bottom right image).

**Figure J.** The effects of anti-B16 anti-serum on relapse rates of B16 tumours after ingenol mebutate treatment. Mice (n=5 per group) were treated with ingenol mebutate or placebo plus anti-B16 antiserum or medium. The antibody had an ELISA IgG end point titre of 1/36,000 (using B16 lysate as antigen) and was generated by immunising mice with B16 lysates formulated with Montanide ISA 720 (Le et al., 2009); 80  $\mu$ l was adoptively transferred on day 0 by i.p. injection.

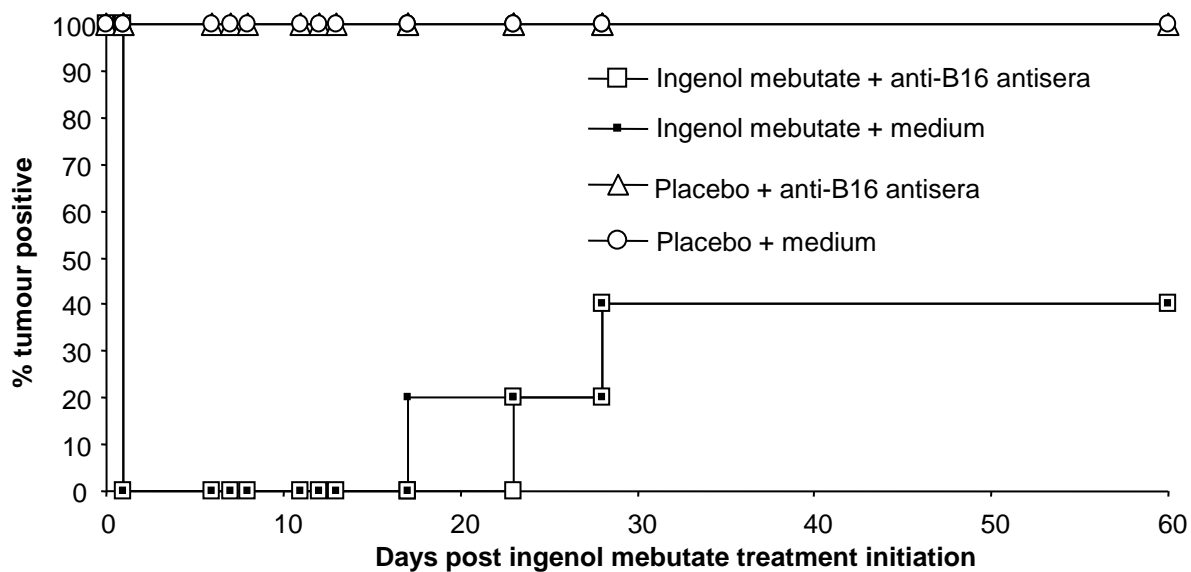

Supplement: pone.0153975.s001.pdf [file pone.0153975.s001.pdf]
